# Supplementary material for: Analyzing synthesis routes for BaCuPO4: implications for hydrogen evolution and supercapattery performance
Source: Royal Society of Chemistry journal article supplement (doi:10.1039/d3ra07596f), 2023-01-01
Supplement: d3ra07596f1.pdf [file d3ra07596f1.pdf]

## Analyzing Synthesis Routes for BaCuPO<sub>4</sub>: Implications for Hydrogen Evolution and Supercapattery Performance"

Sarfraz Ali<sup>1</sup>, Haseebul Hassan<sup>1</sup>, Muhammad Waqas Iqbal<sup>1\*</sup>, Amir Muhammad Afzal<sup>1</sup>,  
Mohammed A. Amin<sup>2</sup>, A. Alhadrami<sup>2</sup>, Nawal D. Alqarni<sup>3</sup>, Ehtisham Umar<sup>4</sup>,

<sup>1</sup>Department of Physics, Riphah International University, Campus Lahore, Pakistan

<sup>2</sup>Department of Chemistry, College of Science, Taif University, P.O. Box 11099, Taif

<sup>3</sup>Department of Chemistry, College of Science, University of Bisha, Bisha, 61922, Saudi Arabia

<sup>4</sup>Department of Physics, Government College University Lahore, 54000, Punjab, Pakistan

E-mail: [waqas.iqbal@riphah.edu.pk](mailto:waqas.iqbal@riphah.edu.pk)

### Supplementary Section:

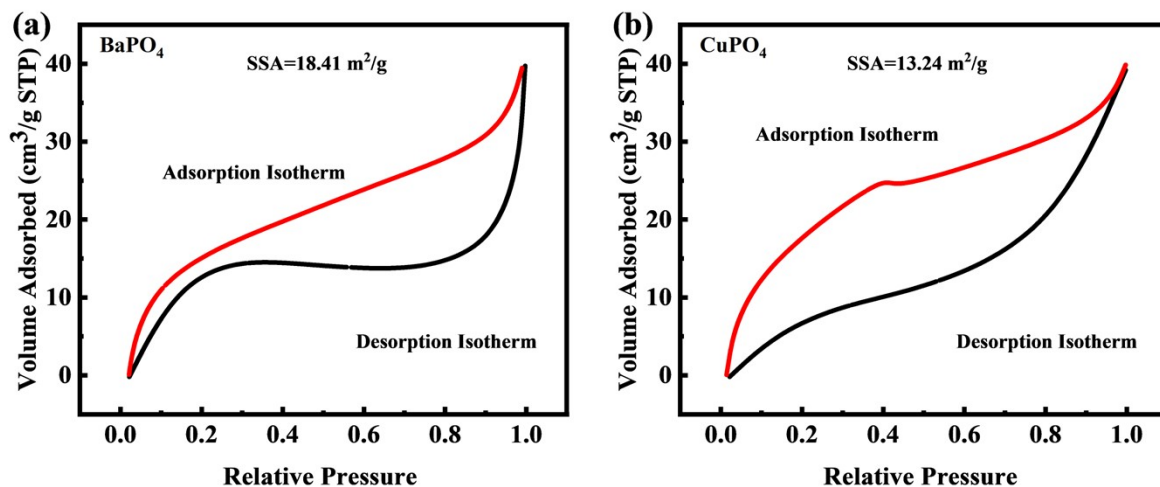

Fig. S1 BET isotherm of BaPO<sub>4</sub> and CuPO<sub>4</sub> nanocomposites.

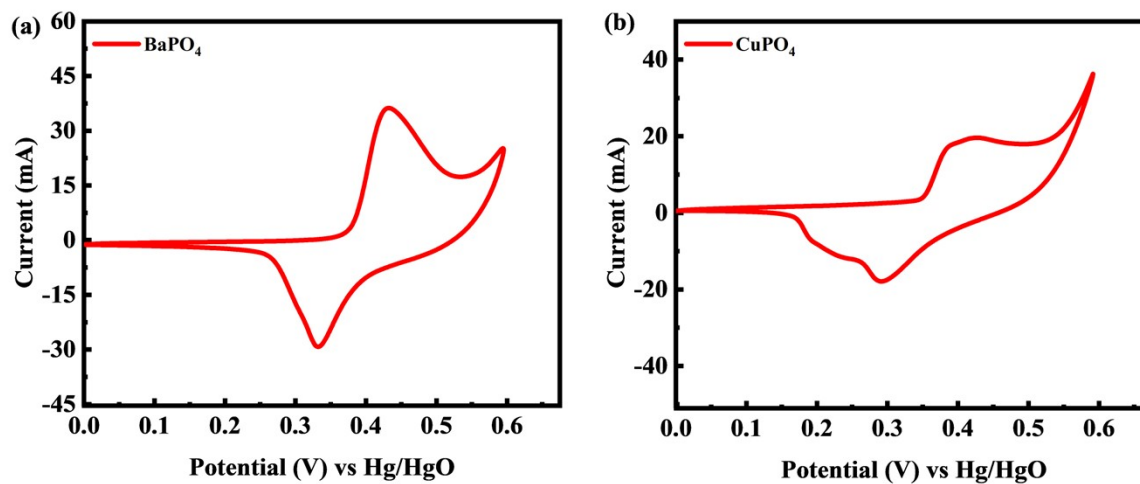

Fig S2 Cyclic voltammetry of BaPO<sub>4</sub> and CuPO<sub>4</sub> nanocomposites at 3 mV/s scan rat.

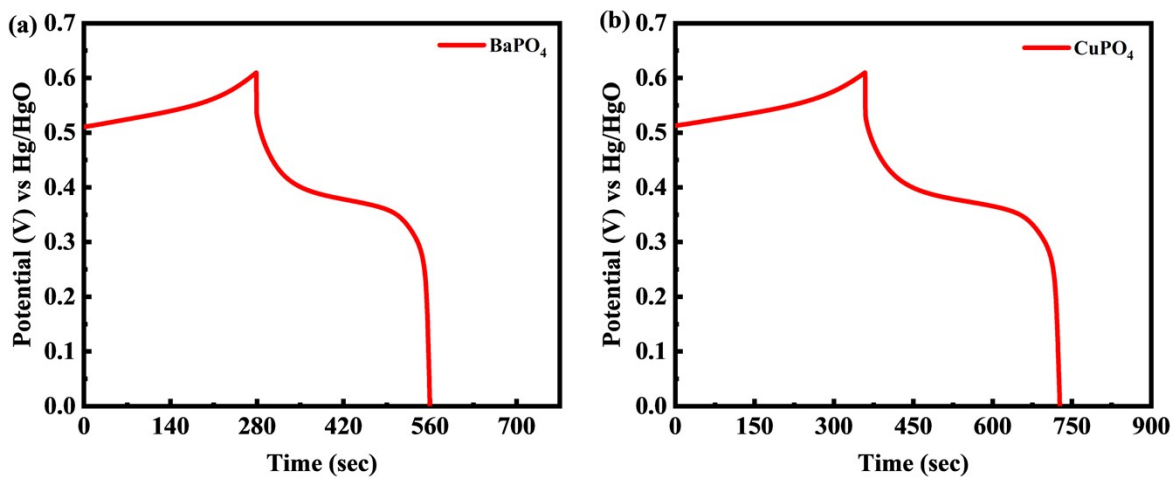

Fig S3 Galvanostatic charge-discharge of BaPO<sub>4</sub> and CuPO<sub>4</sub> nanocomposites.
